# Supplementary material for: Ferroelectricity and antiferromagnetism in organic–inorganic hybrid (1,4-bis(imidazol-1-ylmethyl)benzene)CuCl4·H2O
Source: Royal Society of Chemistry journal article supplement (doi:10.1039/c9ce01607d), 2019-11-18
Supplement: c9ce01607d1.pdf [file c9ce01607d1.pdf]

**Electronic Supplementary Information For**

**Ferroelectricity and Antiferromagnetism in Organic–inorganic  
Hybrid (1,4-Bis(imidazol-1-ylmethyl)benzene)CuCl<sub>4</sub>·H<sub>2</sub>O**

Chunli Jiang,<sup>[a]</sup> Qianqian Luo,<sup>[b]</sup> Hanmei Fu,<sup>[b]</sup> Hechun Lin,<sup>[b]</sup> Chunhua Luo,<sup>[b]</sup> Jianlu Wang,<sup>\*[a]</sup> Xiangjian Meng,<sup>[a]</sup> Hui Peng,<sup>\*[b][c]</sup> Chun-Gang Duan,<sup>[b][c]</sup> and Junhao Chu<sup>[a]</sup>

<sup>a</sup> National Laboratory for Infrared Physics, Shanghai Institute of Technical Physics, Chinese Academy of Science, Shanghai 200083, China.

<sup>b</sup> Key Laboratory of Polar Materials and Devices (MOE), Department of Electronics, East China Normal University, Shanghai, 200241, China.

<sup>c</sup> Collaborative Innovation Center of Extreme Optics, Shanxi University, Taiyuan, Shanxi.

**Crystallographic Data**

**Table S1.** Crystal data and structure refinement for (bix)CuCl<sub>4</sub>·H<sub>2</sub>O.

| Compound                                                       | (bix)CuCl <sub>4</sub> ·H <sub>2</sub> O                           |
|----------------------------------------------------------------|--------------------------------------------------------------------|
| Chemical formula                                               | C <sub>14</sub> H <sub>18</sub> Cl <sub>4</sub> CuN <sub>4</sub> O |
| Formula weight                                                 | 461.65                                                             |
| Temperature /K                                                 | 173                                                                |
| Crystal system                                                 | monoclinic                                                         |
| Space group                                                    | <i>Pc</i>                                                          |
| <i>a</i> /Å                                                    | 7.1235(2)                                                          |
| <i>b</i> /Å                                                    | 11.1935(4)                                                         |
| <i>c</i> /Å                                                    | 11.6744(4)                                                         |
| $\alpha$ /°                                                    | 90                                                                 |
| $\beta$ /°                                                     | 97.716(1)                                                          |
| $\gamma$ /°                                                    | 90                                                                 |
| <i>V</i> /Å <sup>3</sup>                                       | 922.45(5)                                                          |
| <i>Z</i>                                                       | 2                                                                  |
| $\rho_{\text{calc}}$ /cm <sup>3</sup>                          | 1.669                                                              |
| $\mu$ /mm <sup>-1</sup>                                        | 7.089                                                              |
| F(000)                                                         | 470.0                                                              |
| <i>h</i> , <i>k</i> , <i>l</i> <sub>max</sub>                  | 8,13,14                                                            |
| $\theta_{\text{max}}$                                          | 68.185                                                             |
| R <sub>1</sub> [ <i>I</i> > 2 $\sigma$ <i>I</i> ] <sup>a</sup> | 0.0268                                                             |
| wR2                                                            | 0.0678                                                             |
| <i>S</i>                                                       | 1.121                                                              |

**Table S2.** Selected bond lengths (Å) and bond angles (°) for (bix)CuCl<sub>4</sub>·H<sub>2</sub>O

|         |            |             |           |
|---------|------------|-------------|-----------|
| Cu1–Cl1 | 2.2483(8)  | Cl2–Cu1–Cl1 | 131.96(4) |
| Cu1–Cl2 | 2.2738(9)  | Cl2–Cu1–Cl3 | 97.95(4)  |
| Cu1–Cl3 | 2.2320(9)  | Cl3–Cu1–Cl1 | 99.01(3)  |
| Cu1–Cl4 | 2.2489(10) | Cl4–Cu1–Cl1 | 101.18(4) |
|         |            | Cl4–Cu1–Cl2 | 96.77(3)  |
|         |            | Cl4–Cu1–Cl3 | 136.14(4) |

**Table S3.** Hydrogen bonds of compound (bix)CuCl<sub>4</sub>·H<sub>2</sub>O

| D–H···A            | d(D–H) (Å) | d(H···A) (Å) | d(D···A) (Å) | ∠(DHA) (°) |
|--------------------|------------|--------------|--------------|------------|
| N(4)–H(4)···Cl(2)  | 0.88       | 2.31         | 3.110(3)     | 151        |
| N(2)–H(2)···O(1)   | 0.88       | 1.89         | 2.748(5)     | 164        |
| O(1)–H(1B)···Cl(3) | 0.85       | 2.43         | 3.173(4)     | 147        |
| O(1)–H(1A)···Cl(4) | 0.84       | 2.44         | 3.253(4)     | 162        |

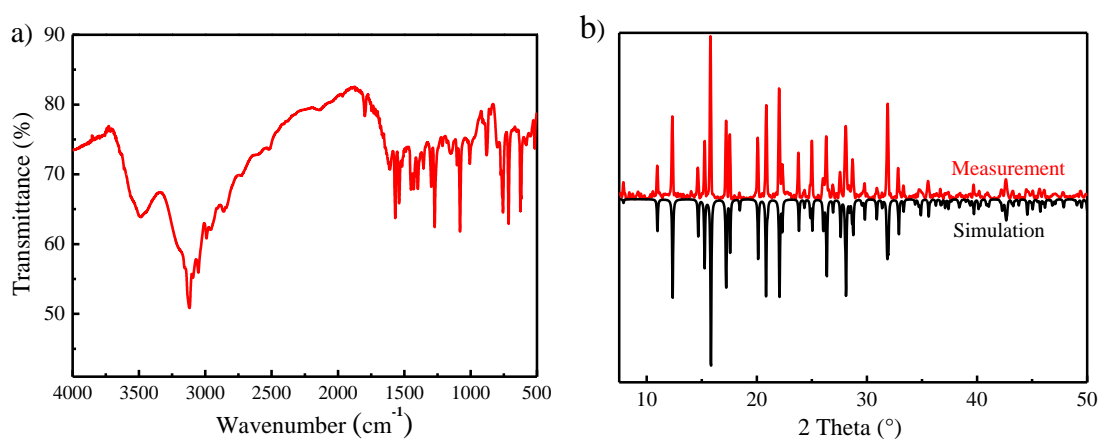**Fig. S1.** (a) Infrared spectrum and (b) powder XRD patterns of (bix)CuCl<sub>4</sub>·H<sub>2</sub>O, verifying the purity of the bulk phase.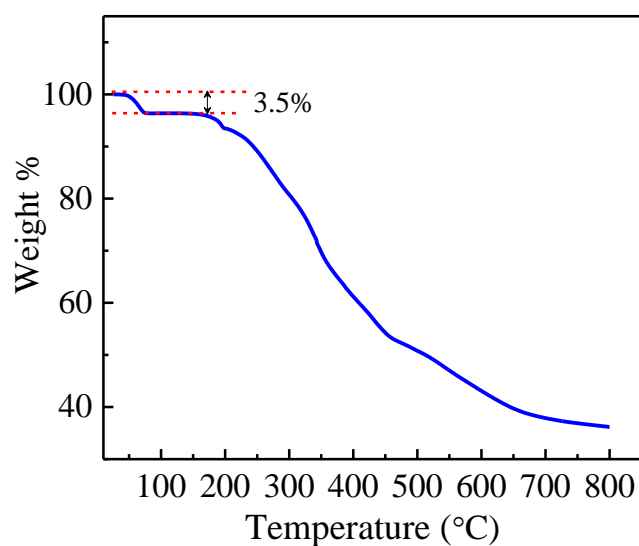**Fig. S2.** TGA curve of (bix)CuCl<sub>4</sub>·H<sub>2</sub>O.

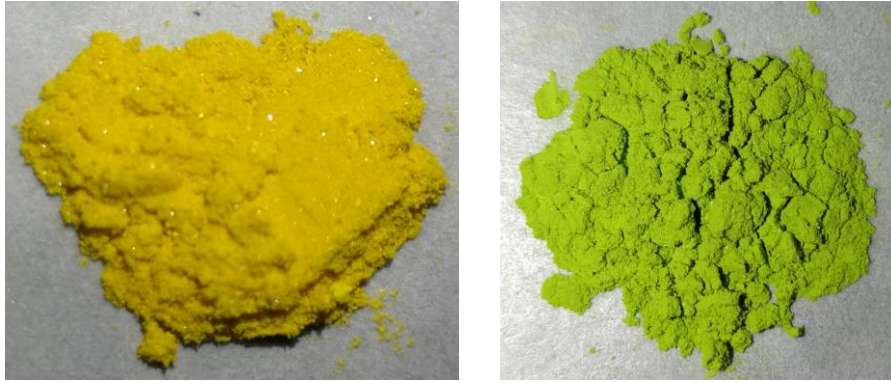

Fig. S3. Images for powder of the as synthesized and dehydrated phase of  $(\text{bix})\text{CuCl}_4 \cdot \text{H}_2\text{O}$ .

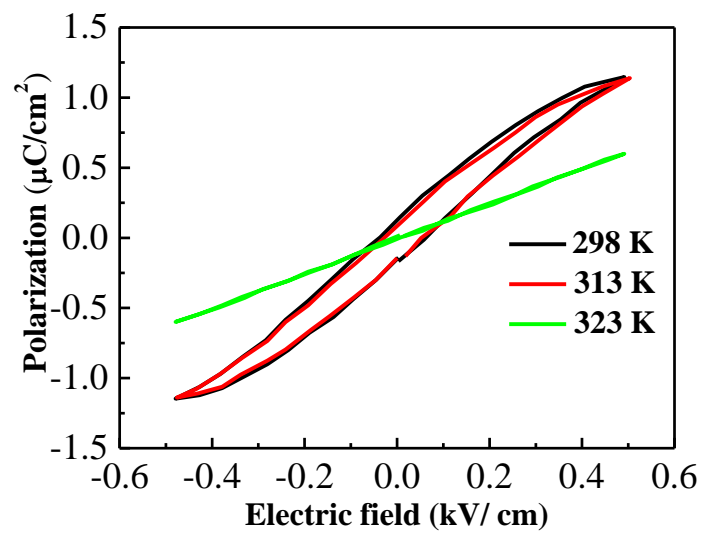

Fig. S4.  $P$ - $E$  hysteresis loops recorded on crystal of  $(\text{bix})\text{CuCl}_4 \cdot \text{H}_2\text{O}$  at different temperatures with frequency of 50 Hz.

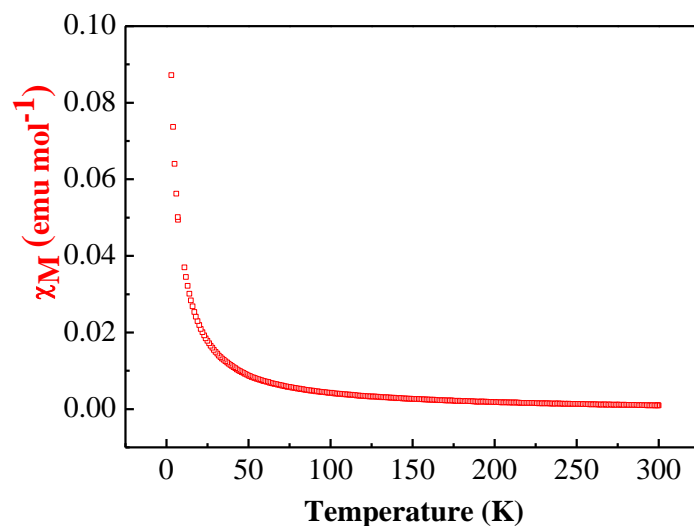

Fig. S5. Temperature dependence of the molar magnetic susceptibility ( $\chi_M$ ) for the dehydrated sample.

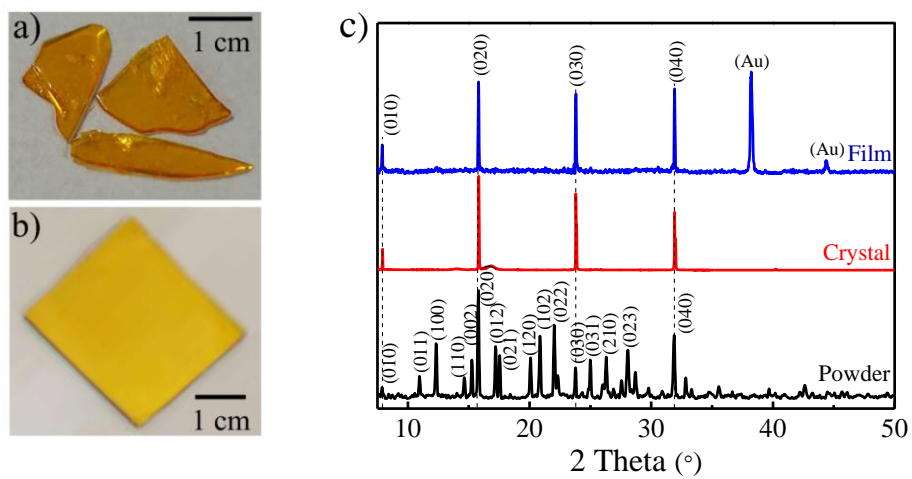

**Fig. S6.** Optical photographs of crystals (a), thin film of (b)  $\text{CuCl}_4 \cdot \text{H}_2\text{O}$  on Au/glass substrate (b) and their XRD patterns compared with the powder sample (c).

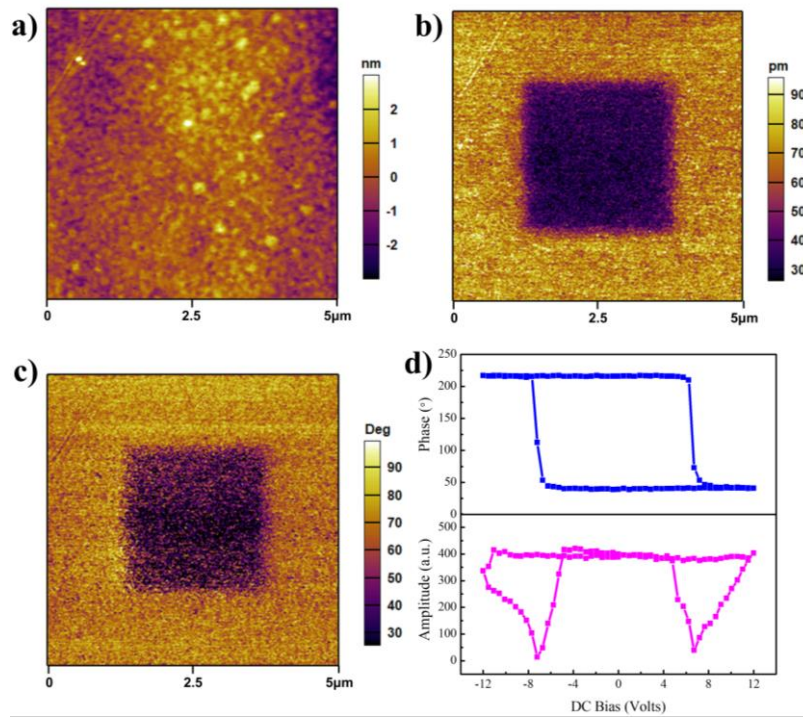

**Fig. S7.** PFM images and polarization switching for the thin film of  $(\text{bix})\text{CuCl}_4 \cdot \text{H}_2\text{O}$ . (a) Topographic image, (b) amplitude image and (c) phase image recorded after applying -9 V and +9 V voltage. (d) Hysteresis and butterfly loops.
